# Supplementary material for: Acetylene hydrochlorination over bimetallic Ru-based catalysts
Source: Royal Society of Chemistry journal article supplement (doi:10.1039/c3ra42867b), 2013-01-01
Supplement: c3ra42867b.pdf [file c3ra42867b.pdf]

## Acetylene Hydrochlorination over bimetallic Ru-based catalysts

Jinli Zhang<sup>a,b</sup>, Wei Sheng<sup>a</sup>, CuiliGuo<sup>a</sup>, Wei Li<sup>a</sup> (\*)

(<sup>a</sup>Key Laboratory for Green Chemical Technology MOE; Key Laboratory of Systems Bioengineering MOE, Tianjin University, Tianjin 300072, People's Republic of China; <sup>b</sup>School of Chemistry and Chemical Engineering, Shihezi University, Xinjiang, Shihezi, 832000, People's Republic of China.)

### Supplementary Information

#### Table of contents:

**Fig.S1.** XPS profiles of the 1%Ru-based catalysts.

**Table S1.** Weight loss of fresh and used 1%Ru/SAC catalysts under different temperature ranges

**Table S2.** Weight loss of fresh and used 1%Ru1Cu1/SAC catalysts under different temperature ranges

**Table S3.** Weight loss of fresh and used 1%Ru1Co3/SAC catalysts under different temperature ranges

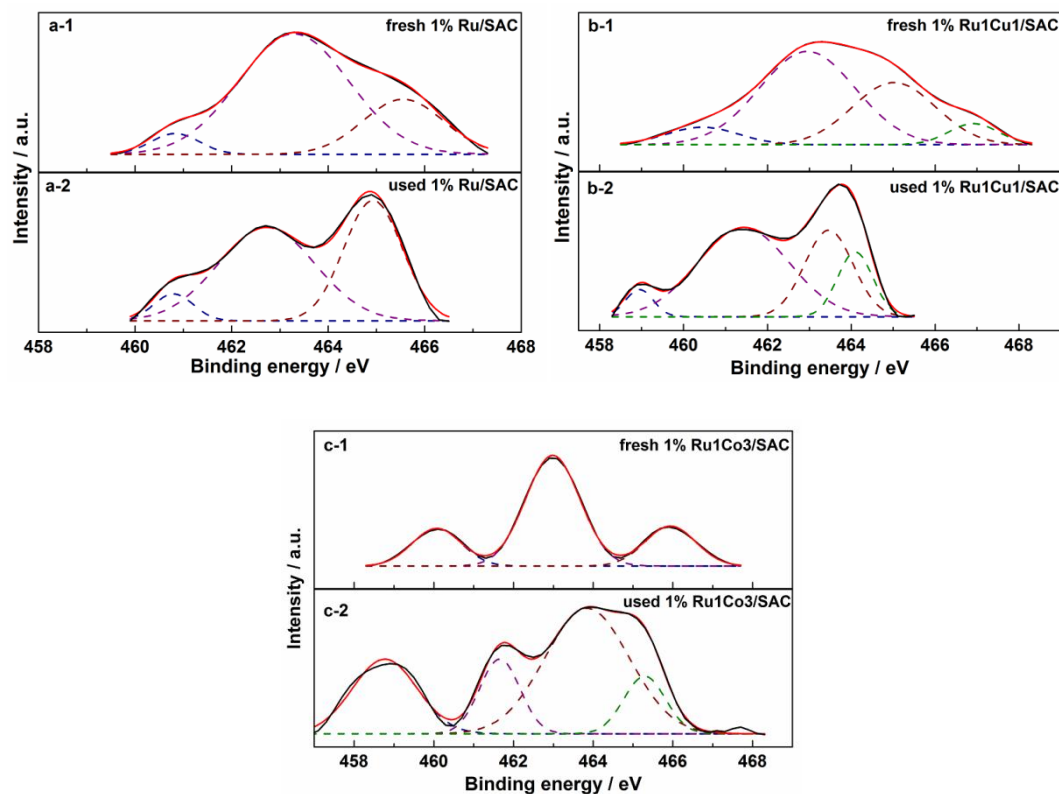

Fig.S1 XPS profiles of the 1%Ru-based catalysts.

Table S1 Weight loss of fresh and used 1%Ru/SAC catalysts under different temperature ranges

| Temperature/°C                                 | <150°C | 150-370 |
|------------------------------------------------|--------|---------|
| Weight loss of fresh 1%Ru/SAC catalyst, (%)    | 3.28   | 2.57    |
| Weight loss of used 1%Ru/SAC-12h catalyst, (%) | 3.02   | 7.88    |
| Weight loss of used 1%Ru/SAC-24h catalyst, (%) | 3.41   | 8.27    |
| Weight loss of used 1%Ru/SAC-36h catalyst, (%) | 3.01   | 8.67    |
| Weight loss of used 1%Ru/SAC-48h catalyst, (%) | 3.70   | 8.80    |

Table S2 Weight loss of fresh and used 1%Ru1Cu1/SAC catalysts under different temperature ranges

| Temperature/°C                                     | <150°C | 150-370 |
|----------------------------------------------------|--------|---------|
| Weight loss of fresh 1%Ru1Cu1/SAC catalyst, (%)    | 2.40   | 1.95    |
| Weight loss of used 1%Ru1Cu1/SAC-12h catalyst, (%) | 1.39   | 8.01    |
| Weight loss of used 1%Ru1Cu1/SAC-24h catalyst, (%) | 2.31   | 8.82    |
| Weight loss of used 1%Ru1Cu1/SAC-36h catalyst, (%) | 1.15   | 9.55    |
| Weight loss of used 1%Ru1Cu1/SAC-48h catalyst, (%) | 1.97   | 9.55    |

Table S3 Weight loss of fresh and used 1%Ru1Co3/SAC catalysts under different temperature ranges

| Temperature/°C                                     | <200°C | 200-325 | 325-400 |
|----------------------------------------------------|--------|---------|---------|
| Weight loss of fresh 1%Ru1Co3/SAC catalyst, (%)    | 4.05   | 11.83   | 0.31    |
| Weight loss of used 1%Ru1Co3/SAC-12h catalyst, (%) | 3.72   | 9.19    | 3.03    |
| Weight loss of used 1%Ru1Co3/SAC-24h catalyst, (%) | 6.48   | 10.25   | 3.56    |
| Weight loss of used 1%Ru1Co3/SAC-36h catalyst, (%) | 4.57   | 8.34    | 3.77    |
| Weight loss of used 1%Ru1Co3/SAC-48h catalyst, (%) | 5.89   | 8.24    | 4.19    |
